# Supplementary material for: Repurposing of Four Drugs as Anti-SARS-CoV-2 Agents and Their Interactions with Protein Targets
Source: MDPI journal article supplement (doi:10.3390/scipharm90020024), 2022-04-14
Supplement: s1 [file s1]

## Supporting Information

### Repurposing of Four Drugs as Anti-SARS-CoV-2 Agents and Their Interactions with Protein Targets

Luis C. Vesga<sup>1</sup>, Camilo A. Ruiz-Hernández<sup>1</sup>, Jeimmy J. Alvarez-Jácome<sup>1</sup>, Jonny E. Duque<sup>2</sup>, Bladimiro Rincón-Orozco<sup>1,3</sup>, Stelia Carolina Mendez-Sanchez<sup>1,3,\*</sup>

<sup>1</sup> Grupo de Investigación en Bioquímica y Microbiología (GIBIM), Universidad Industrial de Santander A. A. 678, Piedecuesta 681027, Colombia; luis.vesga@correo.uis.edu.co (L.C.V.); camilo2162151@correo.uis.edu.co (C.A.R.-H.); jeimmy2171468@correo.uis.edu.co (J.J.A.-J.); blrincon@uis.edu.co (B.R.-O.)

<sup>2</sup> Centro de Investigación en Enfermedades Tropicales (CINTROP), Universidad Industrial de Santander A. A. 678, Piedecuesta 681027, Colombia; jonedulu@uis.edu.co

<sup>3</sup> Grupo de Investigación en Compuestos Orgánicos de Interés Medicinal CODEIM, Universidad Industrial de Santander A. A. 678, Piedecuesta 681027, Colombia

\* Corresponding author: scmendez@uis.edu.co

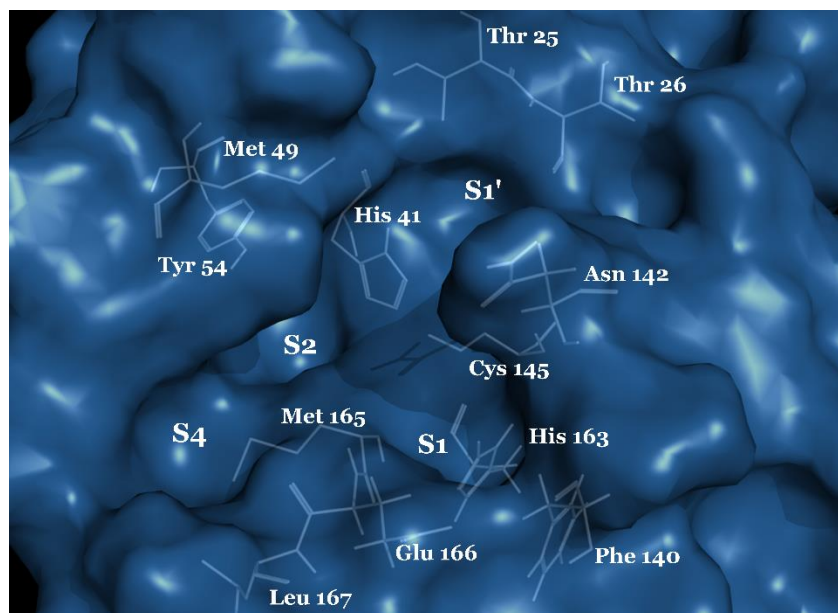

**Figure S1.** Surface representation of substrate-binding pocket in SARS-CoV-2 M<sup>pro</sup>. Relevant amino acid residues, S1, S1', S2, and S4 subsites are indicated. Figure adapted of Jin et al., 2020 [1].

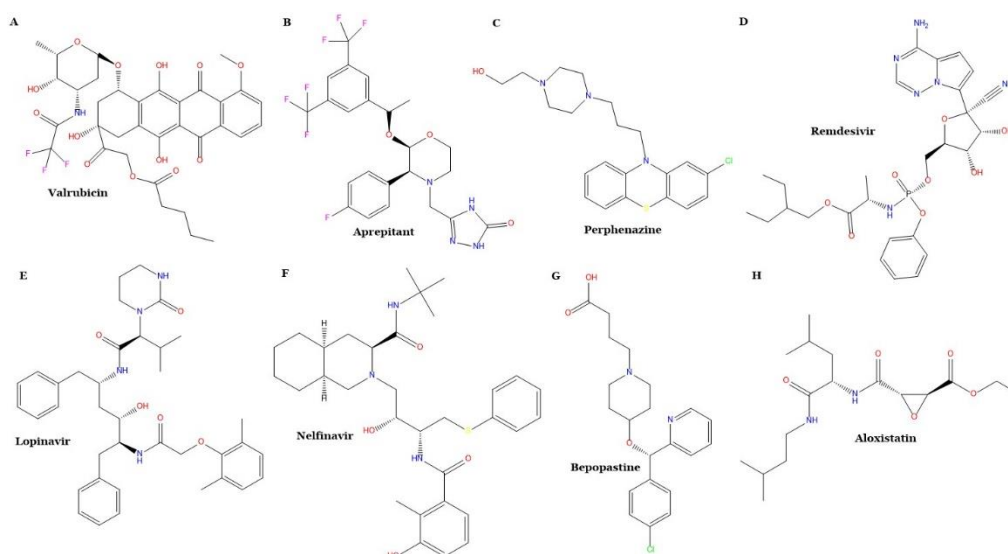

**Figure S2.** List of principal drugs previously predicted as  $M^{pro}$  inhibitors: **(A)** Valrubicin, **(B)** Aprepitant, **(C)** Perphenazine, **(D)** Remdesivir, **(E)** Lopinavir, **(F)** Nelfinavir, **(G)** Bepopastine, **(H)** Aloxistatin.

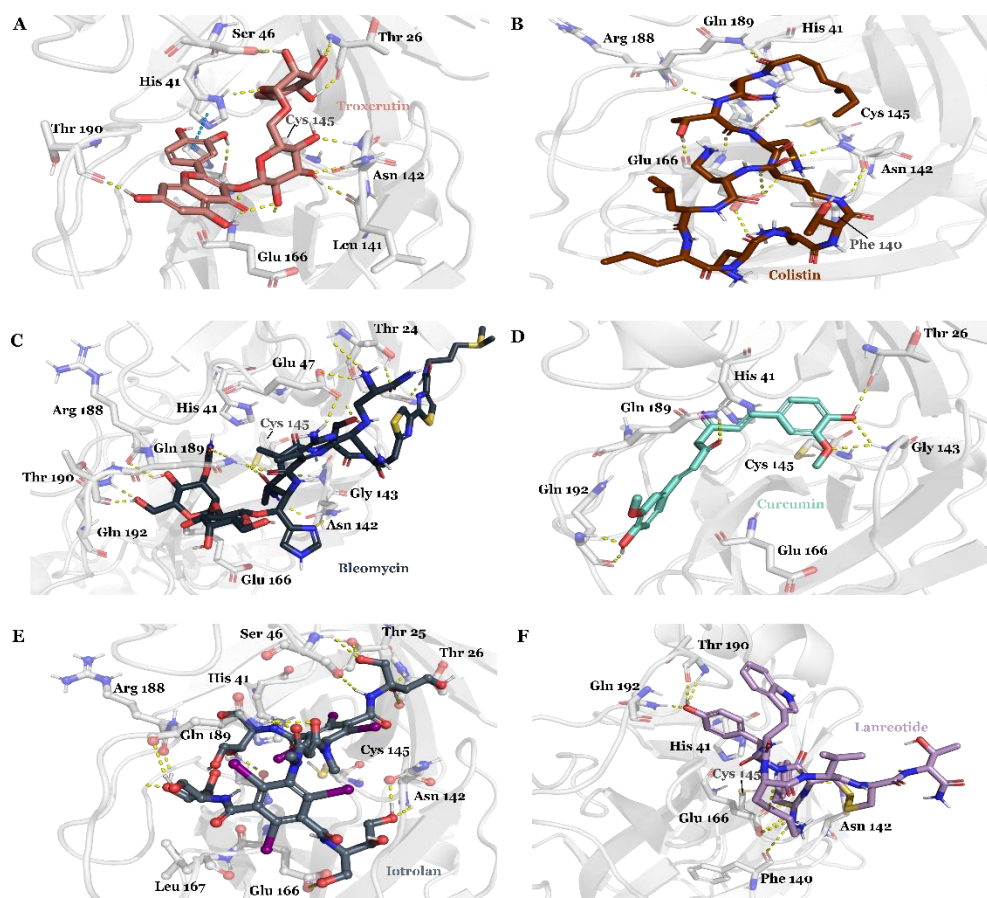

**Figure S3.** Representative snapshots of the docking pose of best ranked FDA-approved drugs interacting in M<sup>pro</sup>. Suggested possible orientations of troxerutin (A), colistin (B), bleomycin (C), curcumin (D), Iotrolan (E), lanreotide (F). M<sup>pro</sup>'s residues are colored according to the atom type of the interacting amino-acid residues (protein's carbon, light grey; oxygen, red; nitrogen, blue). The protein-ligand interactions are represented by dash lines as follow: hydrogen bond interactions are colored in yellow, and  $\pi$ - $\pi$  interactions are colored in blue.

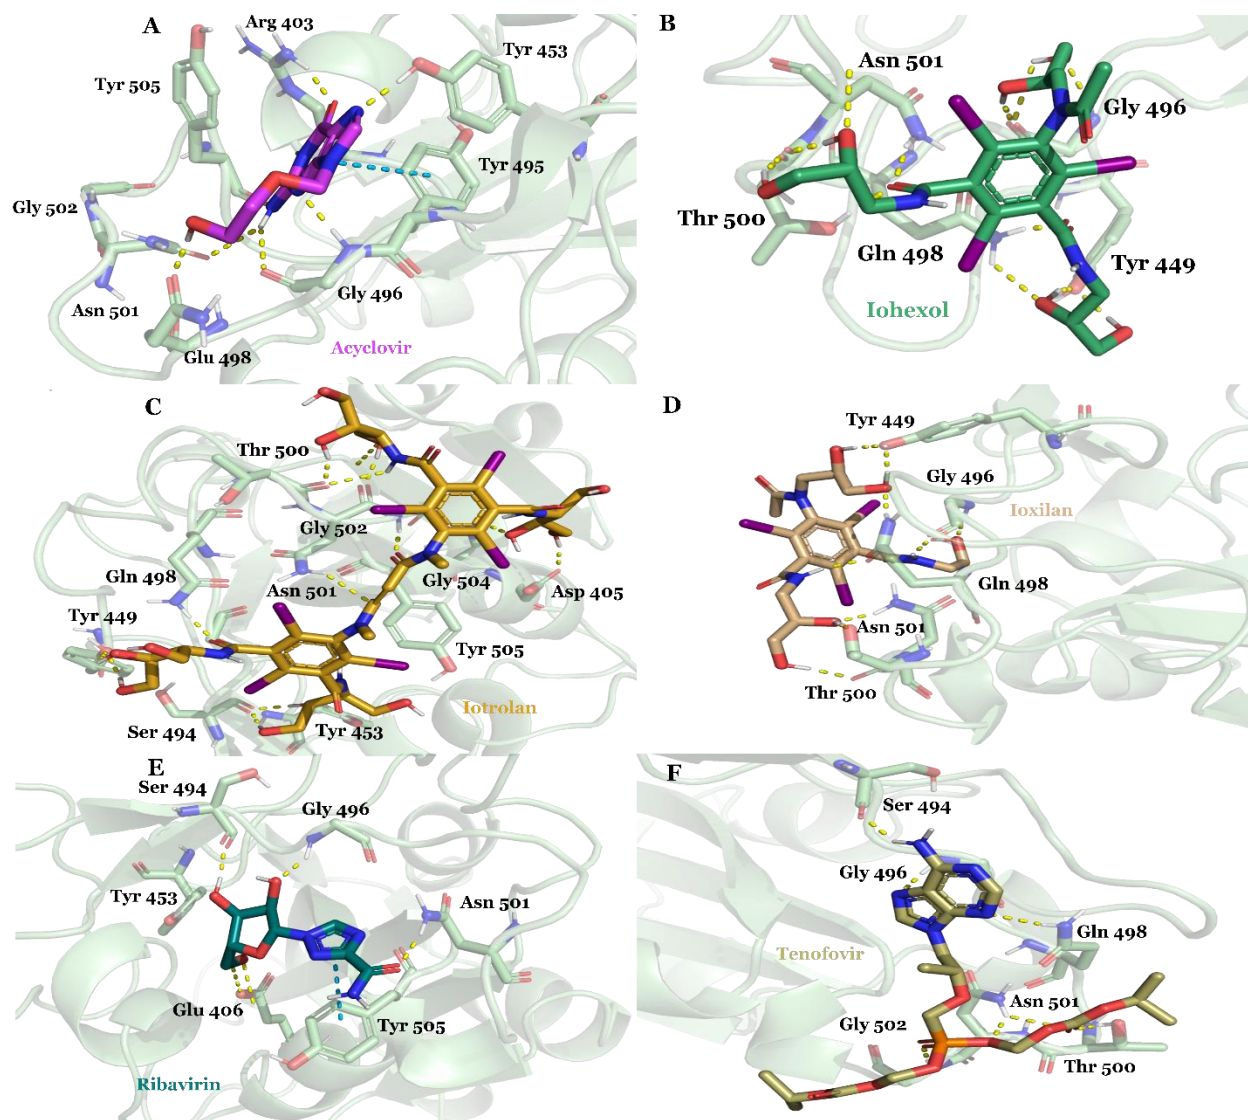

**Figure S4.** Representative snapshots of the docking poses of best ranked FDA-approved drug in S protein. Suggested possible orientations of acyclovir (A), iohexol (B), iotrolan (C), ioxilan (D), ribavirin (E), tenofovir (F). S-protein's residues are colored according to the atom type of the interacting amino-acid residues (protein's

carbon, pale green; oxygen, red; nitrogen, blue). The protein-ligand interactions are represented by dash lines as follow: hydrogen bond interactions are colored in yellow, and  $\pi$ - $\pi$  interactions are colored in blue.

**Table S1.** Docking score and free binding energy calculation of best 15 ranked FDA-approved drugs against SARS-CoV-2 Spike glycoprotein (S-protein) B.1.1.7 (Alpha) variant.

| Compound ID | Traditional Name      | FDA Status | Docking Score | $\Delta G_{(bind)}$<br>kcal/mol | Biological Activity                                                    |
|-------------|-----------------------|------------|---------------|---------------------------------|------------------------------------------------------------------------|
| DB09059     | Atosiban              | Approved   | -5,204        | -66.43                          | Oxytocin receptor [2]                                                  |
| DB04703     | Hesperidin            | Approved,  | -6,284        | -64.44                          | Anti-cancer effect [3]                                                 |
| DB00183     | Pentagastrin          | Approved   | -6,680        | -62.36                          | Gastrin/cholecystokinin type B receptor [4]                            |
| DB06814     | Protokylol            | Approved,  | -5,577        | -57.85                          | Protein homodimerization [5]                                           |
| DB08947     | Iopamidol             | Approved   | -6,535        | -52.36                          | Contrast agent [6]                                                     |
| DB09313     | Ioxaglic acid         | Approved,  | -5,487        | -52.13                          | Contrast for X-Ray images [7]                                          |
| DB00503     | Ritonavir             | Approved   | -7,212        | -50.93                          | HIV-1 inhibitor [8]                                                    |
| DB09142     | Sincalide             | Approved   | -5,280        | -49.16                          | Organic transmembrane transporter [9]                                  |
| DB11705     | Iomeprol              | Approved,  | -6,604        | -48.31                          | Contrast agent [10]                                                    |
| DB09135     | Ioxilan               | Approved   | -5,670        | -46.29                          | Opacification of vessels in contrast médium [11]                       |
| DB03310     | Glutathione disulfide | Approved,  | -4,853        | -45.29                          | Antitumor agent [12]                                                   |
| DB00650     | Leucovorin            | Approved   | -4,804        | -39.82                          | Drug antidote for folic acid antagonists [13]<br>Cancer treatment [14] |
| DB09487     | Iotrolan              | Approved   | -7,544        | -38.04                          | Isotonic contrast medium for intrathecal use [15]                      |
| DB06441     | Cangrelor             | Approved   | -5,388        | -36.72                          | ADP and ATP receptor [16]                                              |
| DB01362     | Iohexol               | Approved   | -5,972        | -34.43                          | Radiocontrast agent [17,18]                                            |

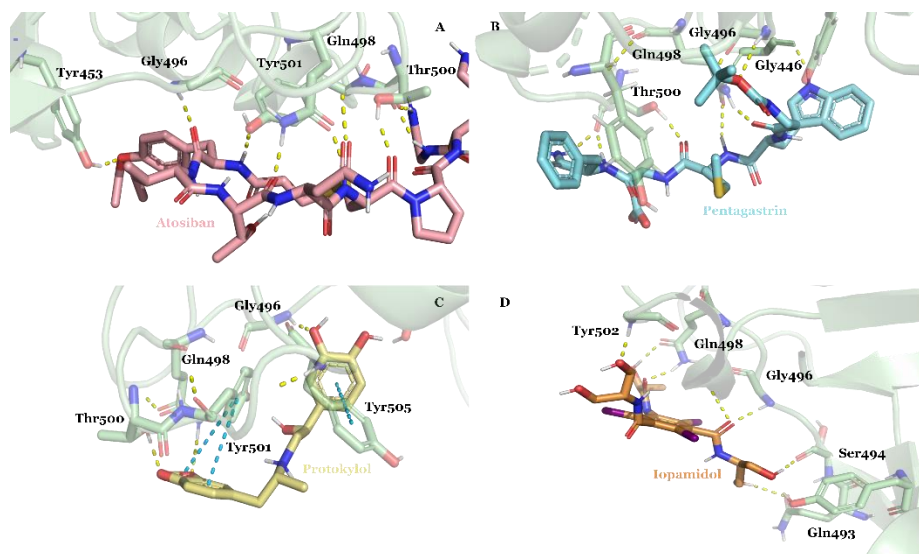

**Figure S5.** Representative snapshots of the docking poses of best ranked FDA-approved drug in B.1.1.7 (Alpha) variant. Suggested possible orientations of atosiban (A), pentagastrin (B), protokylol (C), iopamidol (D). S-protein's residues are colored according to the atom type of the interacting amino-acid residues (protein's carbon, pale green; oxygen, red; nitrogen, blue). The protein-ligand interactions are represented by dash lines as follow: hydrogen bond interactions are colored in yellow, and  $\pi$ - $\pi$  interactions are colored in blue.

**Table S2.** Docking score and free binding energy calculation of best 15 ranked FDA-approved drugs against SARS-CoV-2 Spike glycoprotein (S-protein) B.1.351 (Beta) variant.

| Compound ID | Traditional Name          | FDA Status | Docking Score | $\Delta G_{(bind)}$ kcal/mol | Biological Activity                                        |
|-------------|---------------------------|------------|---------------|------------------------------|------------------------------------------------------------|
| DB04703     | Hesperidin                | Approved,  | -6,516        | -65,70                       | Anti-cancer effect [3]                                     |
| DB15494     | Edotreotide gallium Ga-68 | Approved   | -6,810        | -65,16                       | Somatostatin receptor types 1, 2, 3 and 5 [19]             |
| DB01698     | Rutin                     | Approved   | -8,164        | -61,76                       | Prostaglandin-e2 9-reductase activity [20]                 |
| DB09487     | Iotrolan                  | Approved   | -8,472        | -59,28                       | Contrast agent [15]                                        |
| DB09313     | Ioxaglic acid             | Approved   | -6,043        | -59,09                       | Contrast for X-Ray images [7]                              |
| DB06213     | Regadenoson               | Approved,  | -5,654        | -57,34                       | Identical protein binding. Adenosine receptor [21]         |
| DB09134     | Ioversol                  | Approved   | -6,528        | -53,66                       | Contrast dye for diagnosis procedures [22]                 |
| DB01249     | Iodixanol                 | Approved   | -10,181       | -53,18                       | Radiocontrast agent [23]                                   |
| DB00503     | Ritonavir                 | Approved   | -6,980        | -50,15                       | HIV-1 inhibitor [8]                                        |
| DB09142     | Sincalide                 | Approved   | -5,705        | -47,59                       | Organic transmembrane transporter [9]                      |
| DB06791     | Lanreotide                | Approved   | -5,663        | -42,00                       | Anticancer [24]                                            |
| DB15617     | Ferric derisomaltose      | Approved   | -6,886        | -40,66                       | Hemoglobin subunit Alpha [25]<br>Transferrin receptor [26] |
| DB00183     | Pentagastrin              | Approved   | -6,910        | -37,81                       | Gastrin/cholecystokinin type B receptor [4]                |
| DB09146     | Iron sucrose              | Approved   | -7,775        | -36,69                       | Iron anemia deficiency treatment [27]                      |
| DB01362     | Iohexol                   | Approved   | -8,606        | -36,19                       | Radiocontrast agent [17,18]                                |

**Table S3.** Docking score and free binding energy calculation of best 15 ranked FDA-approved drugs against SARS-CoV-2 Spike glycoprotein (S-protein) B.1.617.2 (Delta) variant.

| <b>Compound ID</b> | <b>Traditional Name</b>     | <b>FDA Status</b> | <b>Docking Score</b> | <b><math>\Delta G_{(bind)}</math><br/>kcal/mol</b> | <b>Biological Activity</b>                                                                          |
|--------------------|-----------------------------|-------------------|----------------------|----------------------------------------------------|-----------------------------------------------------------------------------------------------------|
| DB00014            | Goserelin                   | approved          | -8.681               | -41.75                                             | Treat breast cancer [28], prostate cancer [29]                                                      |
| DB00284            | Acarbose                    | approved          | -7.874               | -54.53                                             | Antidiabetic [30,31]                                                                                |
| DB00803            | Colistin                    | approved          | -7.613               | -48.44                                             | Antibiotic [32]                                                                                     |
| DB14642            | Lypressin                   | approved          | -6.981               | -43.82                                             | Treatment of diabetes insipidus [33]                                                                |
| DB03310            | Glutathione disulfide       | approved          | -6.489               | -12.99                                             | Antitumor agent [12]                                                                                |
| DB01362            | Iohexol                     | approved          | -6.326               | -16.46                                             | Radiocontrast agent [17,18]                                                                         |
| DB06791            | Lanreotide                  | approved          | -6.097               | -46.04                                             | Anticancer [24]                                                                                     |
| DB01598            | Imipenem                    | approved          | -6.043               | -17.56                                             | Antibiotic [34]                                                                                     |
| DB00399            | Zoledronic acid             | approved          | -5.653               | -14.59                                             | Treatment of osteoporosis [35], bone metastases, hypercalcemia of malignancy, multiple myeloma [36] |
| DB03147            | Flavin adenine dinucleotide | approved          | -5.679               | -53.48                                             | Treatment of hypertensive vascular remodeling [37]                                                  |
| DB00007            | Leuprolide                  | approved          | -5.596               | -38.99                                             | Anticancer [38,39]                                                                                  |
| DB01249            | Iodixanol                   | approved          | -5.330               | -36.46                                             | Radiocontrast agent [23]                                                                            |
| DB09156            | Iopromide                   | approved          | -4.285               | -49.48                                             | X-ray contrast agent [40]                                                                           |



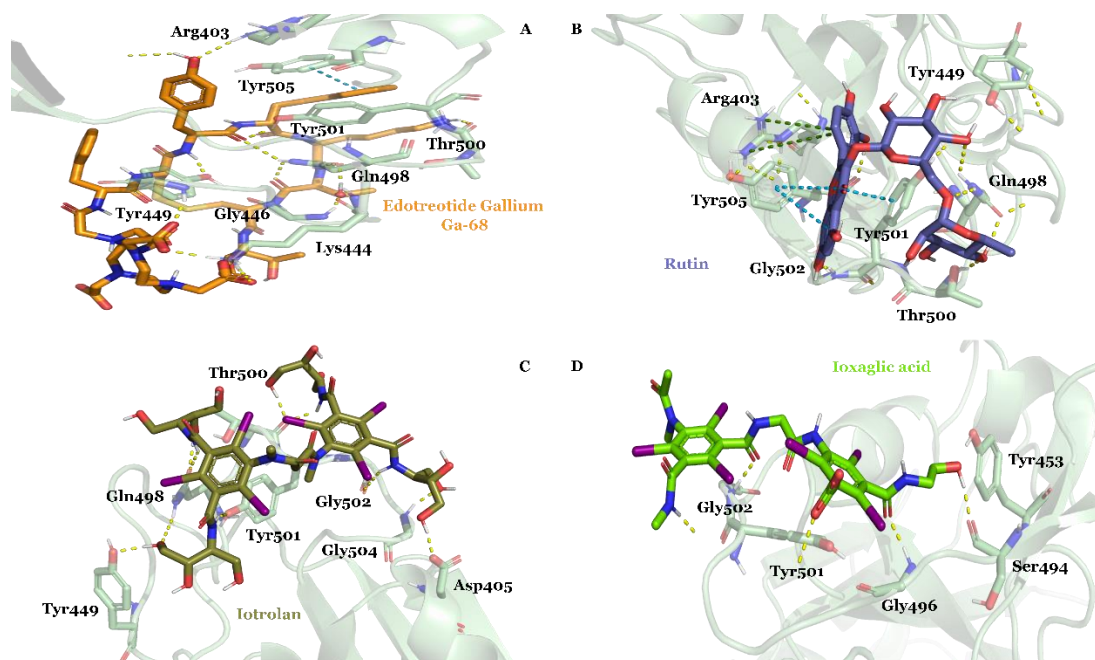

**Figure S6.** Representative snapshots of the docking poses of best ranked FDA-approved drug in B.1.351 (Beta) variant. Suggested possible orientations of Edotreotide Gallium (A), rutin (B), iotrolan (C), ioxaglic acid (D). S-protein's residues are colored according to the atom type of the interacting amino-acid residues (protein's carbon, pale green; oxygen, red; nitrogen, blue). The protein-ligand interactions are represented by dash lines as follow: hydrogen bond interactions are colored in yellow, and  $\pi$ - $\pi$  interactions are colored in blue.

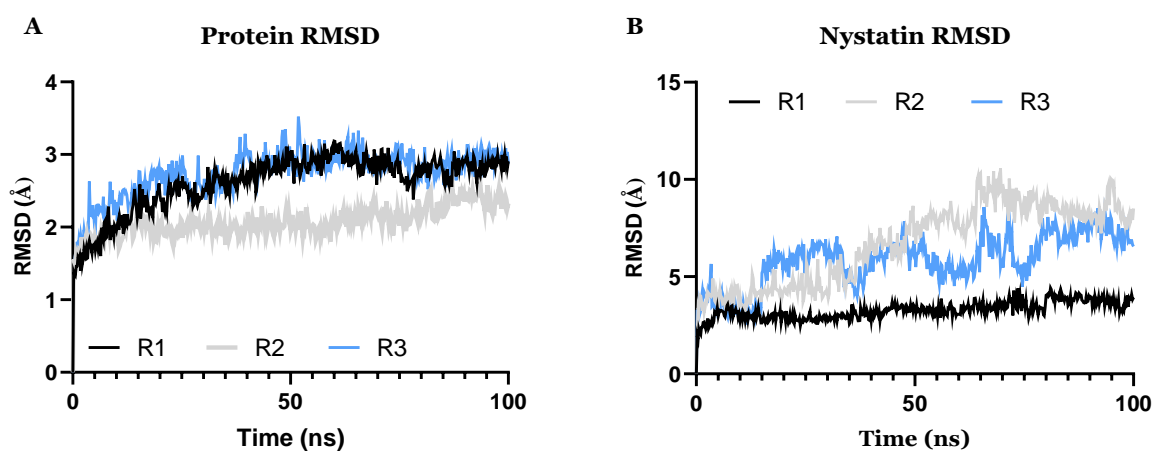

**Figure S7.** Representative picture of root mean square deviation (RMSD) values of protein backbone for the RdRp complexes (A); Ligand RMSD variation along the simulation time for nystatin (B).



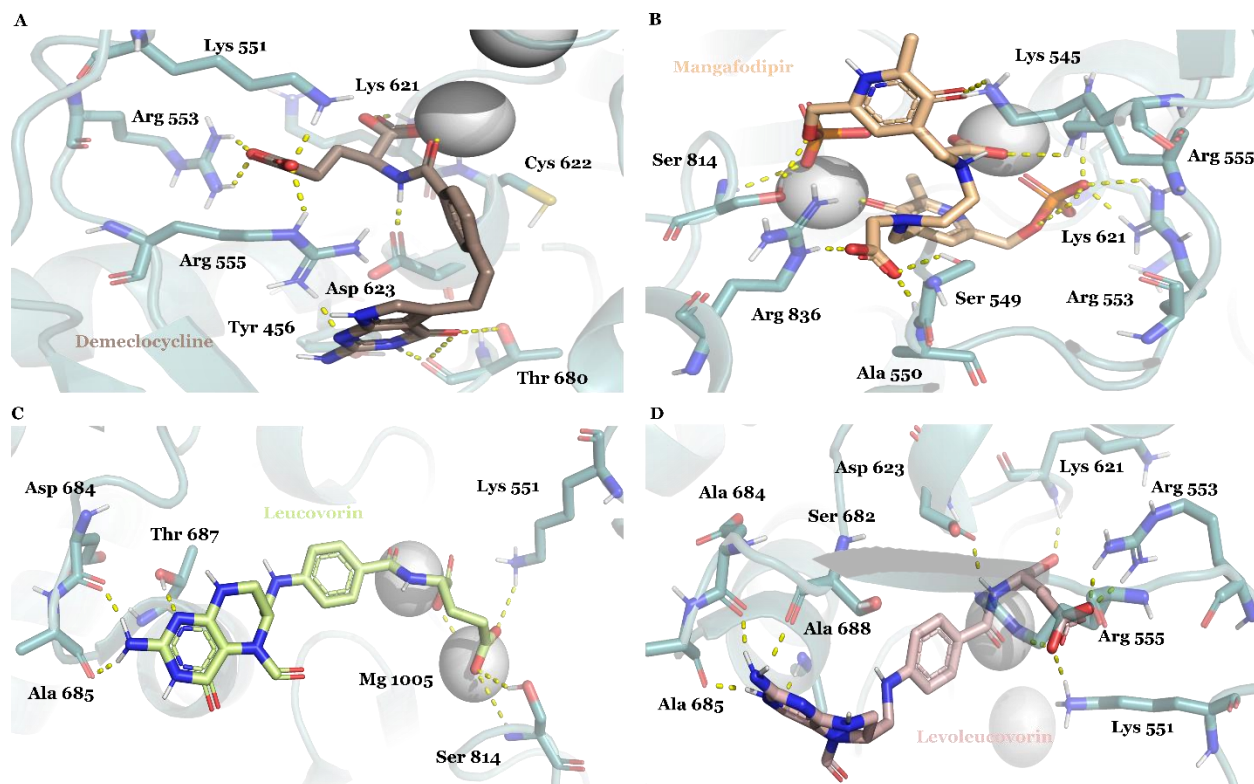

**Figure S8.** Representative snapshot of the docking poses best ranked compounds in RdRp. RdRp's residues are colored according to the atom type of the interacting amino-acid residues (protein's carbon, light teal; oxygen, red; nitrogen, blue). The protein-ligand interactions are represented by dash lines as follow: hydrogen bond interactions are colored in yellow;  $\pi$ - $\pi$  interactions are colored in blue.

## References

1. Jin, Z.; Du, X.; Xu, Y.; Deng, Y.; Liu, M.; Zhao, Y.; Zhang, B.; Li, X.; Zhang, L.; Peng, C.; et al. Structure of M from SARS-CoV-2 and Discovery of Its Inhibitors. *Nature* **2020**, *582*, 289–293.
2. Kim, S.H.; MacIntyre, D.A.; Hanyaloglu, A.C.; Blanks, A.M.; Thornton, S.; Bennett, P.R.; Terzidou, V. The Oxytocin Receptor Antagonist, Atosiban, Activates pro-Inflammatory Pathways in Human Amnion via G( $\alpha$ i) Signalling. *Mol. Cell. Endocrinol.* **2016**, *420*, 11–23.
3. Pandey, P.; Khan, F. A Mechanistic Review of the Anticancer Potential of Hesperidin, a Natural Flavonoid from Citrus Fruits. *Nutr. Res.* **2021**, *92*, 21–31.
4. Radu, D.; Åhlin, A.; Svanborg, P.; Lindefors, N. Anxiogenic Effects of the CCK B Agonist Pentagastrin in Humans and Dose-Dependent Increase in Plasma C-Peptide Levels. *Psychopharmacology* **2002**, *161*, 396–403.
5. Aggerbeck, M.; Guellaën, G.; Hanoune, J. N-Aralkyl Substitution Increases the Affinity of Adrenergic Drugs for the Alpha-Adrenoceptor in Rat Liver. *Br. J. Pharmacol.* **1979**, *65*, 155–159.

6. Ackerson, N.O.B.; Liberatore, H.K.; Plewa, M.J.; Richardson, S.D.; Ternes, T.A.; Duirk, S.E. Disinfection Byproducts and Halogen-Specific Total Organic Halogen Speciation in Chlorinated Source Waters—The Impact of Iopamidol and Bromide. *J. Environ. Sci.* **2020**, *89*, 90–101.
7. Meijenhurst, G.C.; de Bruin, J.N. Hexabrix (ioxaglate), a New Low Osmolality Contrast Agent for Lumbar Epidural Double-Catheter Venography. *Neuroradiology* **1980**, *20*, 29–32.
8. Garriga, C.; Pérez-Elías, M.J.; Delgado, R.; Ruiz, L.; Nájera, R.; Pumarola, T.; del Mar Alonso-Socas, M.; García-Bujalance, S.; Menéndez-Arias, L. Mutational Patterns and Correlated Amino Acid Substitutions in the HIV-1 Protease after Virological Failure to Nelfinavir- and Lopinavir/ritonavir-Based Treatments. *J. Med. Virol.* **2007**, *79*, 1617–1628.
9. Karlgren, M.; Vildhede, A.; Norinder, U.; Wisniewski, J.R.; Kimoto, E.; Lai, Y.; Haglund, U.; Artursson, P. Classification of Inhibitors of Hepatic Organic Anion Transporting Polypeptides (OATPs): Influence of Protein Expression on Drug–Drug Interactions. *J. Med. Chem.* **2012**, *55*, 4740–4763.
10. Zwiener, C.; Glauner, T.; Sturm, J.; Wörner, M.; Frimmel, F.H. Electrochemical Reduction of the Iodinated Contrast Medium Iomeprol: Iodine Mass Balance and Identification of Transformation Products. *Anal. Bioanal. Chem.* **2009**, *395*, 1885–1892.
11. Chow, S.L.; Ng, T.M.H.; Litwinski, R.A.; Kangavari, S.; Weiss, M. Effect of Iodixanol and Ioxilan on QT Interval and Renal Function in Patients with Systolic Heart Failure. *Int. J. Cardiol.* **2012**, *154*, 17–21.
12. Diaz-Montero, C.M.; Wang, Y.; Shao, L.; Feng, W.; Zidan, A.-A.; Pazoles, C.J.; Montero, A.J.; Zhou, D. The Glutathione Disulfide Mimetic NOV-002 Inhibits Cyclophosphamide-Induced Hematopoietic and Immune Suppression by Reducing Oxidative Stress. *Free Radic. Biol. Med.* **2012**, *52*, 1560–1568.
13. Stover, P.J.; Field, M.S. Trafficking of Intracellular Folates. *Adv. Nutr.* **2011**, *2*, 325–331.
14. Chuang, V.T.G.; Suno, M. Levoleucovorin as Replacement for Leucovorin in Cancer Treatment. *Ann. Pharmacother.* **2012**, *46*, 1349–1357.
15. Adolph, J.M.G.; Engelkamp, H.; Herbig, W.; Peters, P.E.; Wenzel-Hora, B.I. Iotrolan in Urography: Efficacy and Tolerance in Comparison with Iohexol and Iopamidol. *Eur. Radiol.* **1995**, *5*, S63–S68.
16. Gan, X.-D.; Wei, B.-Z.; Fang, D.; Fang, Q.; Li, K.-Y.; Ding, S.-L.-Y.; Peng, S.; Wan, J. Efficacy and Safety Analysis of New P2Y<sub>12</sub> Inhibitors versus Clopidogrel in Patients with Percutaneous Coronary Intervention: A Meta-Analysis. *Curr. Med. Res. Opin.* **2015**, *31*, 2313–2323.
17. Holleran, J.L.; Parise, R.A.; Guo, J.; Kiesel, B.F.; Taylor, S.E.; Percy Ivy, S.; Chu, E.; Beumer, J.H. Quantitation of Iohexol, a Glomerular Filtration Marker, in Human Plasma by LC–MS/MS. *J. Pharm. Biomed. Anal.* **2020**, *189*, 113464.
18. Dhondt, L.; Croubels, S.; De Cock, P.; Dhont, E.; De Baere, S.; De Paepe, P.; Devreese, M. Volumetric Absorptive Microsampling as Alternative Sampling Technique for Renal Function Assessment in the Paediatric Population Using Iohexol. *J. Chromatogr. B Anal. Technol. Biomed. Life Sci.* **2021**, *1171*, 122623.

19. Hofmann, M.; Maecke, H.; Börner, A.; Weckesser, E.; Schöffski, P.; Oei, M.; Schumacher, J.; Henze, M.; Heppeler, A.; Meyer, G.; et al. Biokinetics and Imaging with the Somatostatin Receptor PET Radioligand <sup>68</sup>Ga-DOTATOC: Preliminary Data. *Eur. J. Nucl. Med.* **2001**, *28*, 1751–1757.
20. Carlquist, M.; Frejd, T.; Gorwa-Grauslund, M.F. Flavonoids as Inhibitors of Human Carbonyl Reductase 1. *Chem. Biol. Interact.* **2008**, *174*, 98–108.
21. Zoghbi, G.J.; Iskandrian, A.E. Selective Adenosine Agonists and Myocardial Perfusion Imaging. *J. Nucl. Cardiol.* **2012**, *19*, 126–141.
22. Hirshfeld, J.W., Jr.; Wieland, J.; Davis, C.A.; Giles, B.D.; Passione, D.; Ray, M.B.; Ripley, N.S. Hemodynamic and Electrocardiographic Effects of Ioversol during Cardiac Angiography. Comparison with Iopamidol and Diatrizoate. *Investig. Radiol.* **1989**, *24*, 138–144.
23. Grossman, R.I.; Modic, M.T. A Randomized Comparison of Iodixanol and Iohexol in Adult Intracranial Computed Tomography Scanning. *Acad. Radiol.* **1996**, *3* (Suppl. 3), S488–S494.
24. Saif, M.W.; Parikh, R.; Ray, D.; Kaye, J.A.; Kurosky, S.K.; Thomas, K.; Ramirez, R.A.; Halfdanarson, T.R.; Beveridge, T.J.R.; Mirakhur, B.; et al. Medical Record Review of Transition to Lanreotide Following Octreotide for Neuroendocrine Tumors. *J. Gastrointest. Oncol.* **2019**, *10*, 674–687.
25. Peters, F.; Ellermann, I.; Steinbicker, A.U. Intravenous Iron for Treatment of Anemia in the 3 Perisurgical Phases: A Review and Analysis of the Current Literature. *Anesth. Analg.* **2018**, *126*, 1268–1282.
26. Geisser, P.; Burckhardt, S. The Pharmacokinetics and Pharmacodynamics of Iron Preparations. *Pharmaceutics* **2011**, *3*, 12–33.
27. Charytan, C.; Levin, N.; Al-Saloum, M.; Hafeez, T.; Gagnon, S.; Van Wyck, D.B. Efficacy and Safety of Iron Sucrose for Iron Deficiency in Patients with Dialysis-Associated Anemia: North American Clinical Trial. *Am. J. Kidney Dis.* **2001**, *37*, 300–307.
28. R, L.; A, Y.; J, M.; L, F.; V, J. The Affect of Goserelin on the QoL of Women Having Chemotherapy for EBC: Results from the OPTION Trial. *Breast* **2020**, *52*, 122–131.
29. Aljabri, B.; Lilleby, W.; Switlyk, M.D.; Tafjord, G. Restart of Androgen Deprivation Therapy after Goserelin Induced Pituitary Apoplexy in a Patient with Disseminated Prostate Cancer a Case Report and Five-Years Follow-Up. *Urol. Case Rep.* **2021**, *37*, 101648.
30. Tuyen, D.T.; Yew, G.Y.; Cuong, N.T.; Hoang, L.T.; Yen, H.T.; Thao, P.T.H.; Thao, N.T.; le Thanh, N.S.; Trang, N.T.H.; Trung, N.T.; et al. Selection, Purification, and Evaluation of Acarbose—an  $\alpha$ -Glucosidase Inhibitor from *Actinoplanes* Sp. *Chemosphere* **2021**, *265*, 129167.
31. Wang, Z.; Wang, J.; Hu, J.; Chen, Y.; Dong, B.; Wang, Y. A Comparative Study of Acarbose, Vildagliptin and Saxagliptin Intended for Better Efficacy and Safety on Type 2 Diabetes Mellitus Treatment. *Life Sci.* **2021**, *274*, 119069.
32. Loho, T.; Dharmayanti, A. Colistin: An Antibiotic and Its Role in Multiresistant Gram-Negative Infections. *Acta Med. Indones.* **2015**, *47*, 157–168.
33. Weiner, C.P.; Buhimshi, C. *Drugs for Pregnant and Lactating Women E-Book*; Elsevier Health Sciences: Hoboken, NJ, USA, 2009; ISBN 9781437721362.
34. Barza, M. Imipenem: First of a New Class of Beta-Lactam Antibiotics. *Ann. Intern. Med.* **1985**, *103*, 552–560.

35. Deeks, E.D.; Perry, C.M. Zoledronic Acid. *Drugs Aging* **2008**, *25*, 963–986.
36. Wellington, K.; Goa, K.L. Zoledronic Acid. *Drugs* **2012**, *63*, 417–437.
37. Zhong, X.; Ma, Z.; Su, Y.; Li, Z.; Liao, Y.; Pan, X.; Zang, L.; Zhou, S. Flavin Adenine Dinucleotide Ameliorates Hypertensive Vascular Remodeling via Activating Short Chain Acyl-CoA Dehydrogenase. *Life Sci.* **2020**, *258*, 118156.
38. Chung, B.H.; Horie, S.; Chiong, E. Clinical Studies Investigating the Use of Leuprorelin for Prostate Cancer in Asia. *Prostate Int.* **2020**, *8*, 1–9.
39. Bhowmick, N.A.; Oft, J.; Dorff, T.; Pal, S.; Agarwal, N.; Figlin, R.A.; Posadas, E.M.; Freedland, S.J.; Gong, J. COVID-19 and Androgen-Targeted Therapy for Prostate Cancer Patients. *Endocr. Relat. Cancer* **2020**, *27*, R281–R292.
40. Müller, J.; Jewell, K.S.; Schulz, M.; Hermes, N.; Ternes, T.A.; Drewes, J.E.; Hübner, U. Capturing the Oxidic Transformation of Iopromide—A Useful Tool for an Improved Characterization of Predominant Redox Conditions and the Removal of Trace Organic Compounds in Biofiltration Systems? *Water Res.* **2019**, *152*, 274–284.
